# Supplementary material for: Теоретические проблемы уголовно-розыскного права (отдельные положения)
Source: Hindawi journal article supplement (doi:10.1155/2016/1693918), 2009-01-01
Supplement: f1 [file 1693918.f1.pdf]

**Supplemental table S1**

|                                   | gr | pre  |              | post |              | 3 h post |              | 24 h post |              | 48 h post |              | 72 h post |              |
|-----------------------------------|----|------|--------------|------|--------------|----------|--------------|-----------|--------------|-----------|--------------|-----------|--------------|
| <i>Muscle damage and recovery</i> |    |      |              |      |              |          |              |           |              |           |              |           |              |
| CK                                | Pl | 1.3  | (1.0; 2.1)   | 2.0  | (1.5; 2.7)   | 4.9      | (3.3; 6.0)   | 7.8       | (4.6; 1.2)   | 4.3       | (2.5; 5.8)   | 3.0       | (2.0; 4.4)   |
| [U/L] x10 <sup>2</sup>            | Tr | 1.3  | (1.0; 2.2)   | 1.9  | (1.5; 3.6)   | 4.0      | (3.2; 5.9)   | 6.5       | (4.6; 10.0)  | 3.9       | (2.7; 5.8)   | 2.7       | (1.7; 4.7)   |
| LDH                               | Pl | 1.6  | (1.5; 1.9)   | 2.1  | (1.9; 2.2)   | 2.2      | (1.9; 2.3)   | 1.9       | (1.8; 2.1)   | 1.8       | (1.7; 2.0)   | 1.9       | (1.7; 2.0)   |
| [U/L] x10 <sup>2</sup>            | Tr | 1.8  | (1.6; 2.0)   | 2.2  | (2.0; 2.3)   | 2.2      | (2.0; 2.4)   | 1.9       | (1.7; 2.2)   | 1.8       | (1.7; 2.0)   | 1.8       | (1.6; 2.0)   |
| strength (Extension)              | Pl | 4.0  | (3.3; 4.6)   | 3.1  | (2.6; 3.9)   | 3.0      | (2.6; 3.6)   | 3.1       | (2.4; 3.6)   | 3.2       | (2.5; 3.7)   | 2.5       | (2.9; 4.1)   |
| [Nm] x10 <sup>2</sup>             | Tr | 3.8  | (3.3; 4.3)   | 3.0  | (2.5; 3.6)   | 3.0      | (2.6; 3.9)   | 3.3       | (2.3; 3.9)   | 3.4       | (2.8; 4.0)   | 3.5       | (3.0; 4.4)   |
| strength (Flexion)                | Pl | 1.9  | (1.7; 2.1)   | 1.6  | (1.3; 1.8)   | 1.7      | (1.3; 1.9)   | 1.5       | (1.1; 1.8)   | 1.6       | (1.2; 1.9)   | 1.6       | (1.4; 2.0)   |
| [Nm] x10 <sup>2</sup>             | Tr | 1.8  | (1.5; 2.2)   | 1.5  | (1.3; 1.9)   | 1.5      | (1.2; 1.9)   | 1.5       | (1.3; 1.9)   | 1.6       | (1.4; 1.8)   | 1.7       | (1.4; 2.1)   |
| Pain Score Total                  | Pl | 0    | (0; 3.0)     | 32.0 | (17.0; 49.0) | 26.0     | (11.0; 37.0) | 41.0      | (27.0; 65.0) | 36.0      | (19.0; 53.0) | 14.0      | (6.0; 25.0)  |
|                                   | Tr | 0    | (0; 1.0)     | 30.0 | (18.5; 50.0) | 28.5     | (13.0; 44.5) | 41.0      | (25.5; 54.0) | 36.0      | (17.0; 57.0) | 17.5      | (8.0; 26.0)  |
| Pain Score VAS                    | Pl | 0    | (0; 2.0)     | 22.0 | (9.0; 36.0)  | 16.0     | (6.0; 28.0)  | 32.0      | (19.0; 52.0) | 25.0      | (15.0; 38.0) | 10.0      | (3.0; 18.0)  |
|                                   | Tr | 0    | (0; 1.0)     | 24.0 | (9.0; 33.0)  | 22.0     | (8.5; 31.5)  | 31.5      | (19.0; 40.0) | 27.5      | (13.5; 43.5) | 13.0      | (5.5; 20.5)  |
| <i>White blood cell count</i>     |    |      |              |      |              |          |              |           |              |           |              |           |              |
| Basophile                         | Pl | 0.1  | (0; 1.0)     | 0.3  | (0; 1.0)     | 0        | (0; 0.2)     | 0         | (0; 1.0)     | 0.2       | (0; 1.0)     | 0.2       | (0; 1.0)     |
| [%]                               | Tr | 0.3  | (0; 1.0)     | 0.6  | (0; 1.0)     | 0        | (0; 0.2)     | 0.2       | (0; 1.0)     | 0.2       | (0; 1.0)     | 0.4       | (0; 1.0)     |
| Basophile absolute                | Pl | 2.0  | (2.0; 3.0)   | 3.0  | (2.0; 4.0)   | 2.0      | (2.0; 3.0)   | 2.0       | (1.0; 3.0)   | 2.2       | (2.0; 3.0)   | 2.0       | (1.0; 3.0)   |
| [c/nl] x10 <sup>-2</sup>          | Tr | 2.0  | (2.0; 3.0)   | 3.0  | (2.0; 4.0)   | 2.0      | (2.0; 3.0)   | 2.2       | (2.0; 3.0)   | 2.0       | (1.0; 3.0)   | 2.0       | (2.0; 3.0)   |
| Eosinophils                       | Pl | 3.0  | (2.0; 4.0)   | 2.0  | (1.0; 3.0)   | 1.0      | (1.0; 1.3)   | 3.0       | (2.0; 4.0)   | 2.6       | (2.0; 4.0)   | 2.3       | (2.0; 4.0)   |
| [%]                               | Tr | 3.0  | (2.0; 4.3)   | 2.0  | (1.0; 3.0)   | 1.0      | (1.0; 2.0)   | 3.0       | (2.0; 4.1)   | 3.0       | (2.0; 4.0)   | 3.0       | (2.0; 4.0)   |
| Eosinophils absolute              | Pl | 0.2  | (0.1; 0.2)   | 0.1  | (0.1; 0.2)   | 0.1      | (0.1; 0.1)   | 0.1       | (0.1; 0.2)   | 0.2       | (0.1; 0.2)   | 0.1       | (0.1; 0.2)   |
| [c/nl]                            | Tr | 0.2  | (0.1; 0.2)   | 0.1  | (0.1; 0.2)   | 0.1      | (0.1; 0.2)   | 0.2       | (0.1; 0.3)   | 0.1       | (0.1; 0.2)   | 0.1       | (0.1; 0.2)   |
| Leukocytes                        | Pl | 5.4  | (4.6; 6.6)   | 6.8  | (5.5; 7.8)   | 8.8      | (7.5; 10.2)  | 5.6       | (4.5; 6.5)   | 5.4       | (4.6; 6.2)   | 5.3       | (4.4; 5.9)   |
| [tsd/ $\mu$ l]                    | Tr | 5.4  | (4.8; 6.3)   | 6.5  | (5.4; 7.5)   | 8.4      | (7.8; 10.2)  | 5.4       | (4.8; 6.6)   | 5.2       | (4.5; 5.9)   | 5.2       | (4.7; 6.0)   |
| Lymphocytes                       | Pl | 34.9 | (30.0; 39.0) | 33.5 | (29.0; 39.0) | 20.0     | (17.0; 27.0) | 31.0      | (26.0; 37.0) | 33.0      | (27.0; 37.0) | 32.7      | (28.0; 38.0) |
| [%]                               | Tr | 32.0 | (28.0; 37.6) | 31.1 | (27.0; 35.2) | 22.0     | (18.3; 26.0) | 32.0      | (27.0; 36.3) | 31.3      | (29.0; 36.0) | 31.0      | (28.0; 35.4) |
| Lymphocytes absolute              | Pl | 1.9  | (1.5; 2.3)   | 2.2  | (1.7; 2.5)   | 1.8      | (1.5; 2.2)   | 1.8       | (1.4; 2.1)   | 1.7       | (1.5; 2.0)   | 1.7       | (1.4; 2.0)   |
| [c/nl]                            | Tr | 1.7  | (1.5; 2.1)   | 2.0  | (1.6; 2.6)   | 1.9      | (1.7; 2.1)   | 1.7       | (1.5; 2.0)   | 1.7       | (1.4; 1.9)   | 1.6       | (1.4; 1.9)   |
| Monocytes                         | Pl | 8.0  | (7.0; 9.4)   | 8.0  | (7.0; 9.0)   | 8.0      | (6.0; 9.0)   | 8.0       | (7.0; 9.1)   | 8.3       | (7.0; 10.0)  | 8.0       | (7.0; 10.0)  |
| [%]                               | Tr | 9.0  | (7.4; 10.0)  | 8.0  | (7.0; 10.0)  | 8.0      | (7.0; 9.0)   | 8.0       | (7.0; 10.0)  | 8.7       | (7.3; 10.0)  | 8.0       | (7.0; 10.0)  |
| Monocytes absolute                | Pl | 0.4  | (0.4; 0.5)   | 0.6  | (0.4; 0.7)   | 0.6      | (0.5; 0.8)   | 0.4       | (0.4; 0.5)   | 0.5       | (0.4; 0.5)   | 0.4       | (0.3; 0.5)   |
| [c/nl]                            | Tr | 0.5  | (0.4; 0.6)   | 0.5  | (0.4; 0.6)   | 0.7      | (0.6; 0.9)   | 0.4       | (0.4; 0.6)   | 0.5       | (0.4; 0.5)   | 0.4       | (0.4; 0.5)   |
| Neutrophils                       | Pl | 54.0 | (49.5; 57.0) | 55.0 | (52.0; 61.0) | 71.0     | (64.0; 74.0) | 56.7      | (51.0; 62.0) | 57.0      | (50.0; 61.0) | 57.0      | (50.0; 60.0) |
| [%]                               | Tr | 56.9 | (49.5; 60.0) | 59.0 | (51.4; 63.0) | 67.5     | (63.5; 72.1) | 55.1      | (52.0; 61.8) | 55.2      | (50.9; 60.1) | 57.0      | (49.0; 62.0) |
| Neutrophils absolute              | Pl | 2.8  | (2.4; 3.4)   | 3.7  | (3.1; 4.3)   | 5.8      | (5.0; 7.2)   | 3.2       | (2.4; 3.7)   | 2.9       | (2.4; 3.6)   | 2.8       | (2.5; 3.4)   |
| [c/nl]                            | Tr | 3.2  | (2.3; 3.6)   | 3.7  | (3.1; 4.4)   | 5.8      | (4.9; 7.2)   | 3.1       | (2.5; 3.8)   | 2.8       | (2.5; 3.6)   | 3.0       | (2.5; 3.7)   |

Lymphocyte activation and apoptosis

|                                          |    |                             |                             |                             |                             |                             |                             |
|------------------------------------------|----|-----------------------------|-----------------------------|-----------------------------|-----------------------------|-----------------------------|-----------------------------|
| Annexin V                                | Pl | 7.2 (6.3; 10.4)             | 7.6 (5.7; 10.5)             | 6.1 (4.2; 8.4)              | 7.0 (5.8; 9.0)              | 6.8 (5.2; 8.5)              | 6.8 (5.1; 10.9)             |
| [%]                                      | Tr | 7.6 (5.6; 9.7)              | 6.8 (5.5; 10.4)             | 5.8 (4.3; 9.2)              | 6.7 (5.2; 9.0)              | 7.5 (5.3; 10.2)             | 6.6 (4.9; 10.7)             |
| Annexin V absolute                       | Pl | 1.3 (1.0; 1.9)              | 1.6 (1.2; 2.2)              | 1.1 (0.7; 1.6)              | 1.1 (0.9; 1.6)              | 1.1 (0.9; 1.6)              | 1.1 (0.7; 2.0)              |
| [x10 <sup>6</sup> /ml] x10 <sup>-1</sup> | Tr | 1.3 (0.9; 2.1)              | 1.4 (0.9; 2.0)              | 1.1 (0.7; 1.9)              | 1.1 (0.9; 1.8)              | 1.2 (0.9; 1.8)              | 1.1 (0.8; 1.7)              |
| CD62L                                    | Pl | 66.2 (55.8; 73.7)           | 61.8 (50.0; 68.7)           | 68.2 (58.0; 74.3)           | 65.4 (57.3; 70.8)           | 67.3 (57.5; 70.8)           | 66.1 (57.5; 70.7)           |
| [%]                                      | Tr | 65.2 (60.3; 76.9)           | 63.8 (56.7; 68.9)           | 69.6 (61.7; 74.8)           | 63.9 (56.8; 70.8)           | 65.6 (60.8; 72.0)           | 66.9 (60.2; 73.5)           |
| CD62L absolute                           | Pl | 1.3 (0.8; 1.6)              | 1.4 (1.0; 1.7)              | 1.2 (0.9; 1.5)              | 1.1 (0.8; 1.3)              | 1.2 (0.8; 1.4)              | 1.2 (0.8; 1.4)              |
| [x10 <sup>6</sup> /ml]                   | Tr | 1.1 (0.9; 1.5)              | 1.2 (1.0; 1.7)              | 1.4 (1.1; 1.5)              | 1.1 (0.8; 1.5)              | 1.1 (0.9; 1.3)              | 1.0 (0.9; 1.3)              |
| CD69                                     | Pl | 0.4 (0.2; 0.7)              | 0.4 (0.2; 0.6)              | 0.4 (0.2; 0.6)              | 0.5 (0.2; 0.7)              | 0.4 (0.3; 0.6)              | 0.5 (0.3; 0.7)              |
| [%]                                      | Tr | 0.3 (0.2; 0.7)              | 0.5 (0.3; 0.8)              | 0.4 (0.2; 0.7)              | 0.4 (0.2; 0.6)              | 0.4 (0.2; 0.6)              | 0.4 (0.2; 0.6)              |
| CD69 absolute                            | Pl | 6.9 (3.9; 11.3)             | 7.1 (3.8; 14.4)             | 6.6 (3.2; 10.7)             | 8.8 (3.3; 18.7)             | 6.7 (4.0; 13.1)             | 6.9 (3.6; 11.7)             |
| [x10 <sup>6</sup> /ml] x10 <sup>-3</sup> | Tr | 5.7 (4.0; 12.7)             | 9.5 (4.1; 17.2)             | 7.2 (4.0; 13.0)             | 6.4 (3.4; 11.1)             | 7.7 (4.1; 11.6)             | 5.1 (2.6; 10.0)             |
| CD95R                                    | Pl | 15.7 (13.0; 20.4)           | 14.0 (11.8; 20.2)           | 16.4 (13.8; 20.1)           | 15.7 (13.2; 21.5)           | 16.4 (13.4; 22.2)           | 16.9 (13.3; 20.3)           |
| [%]                                      | Tr | 16.0 (13.5; 20.1)           | 16.6 (14.3; 19.7)           | 18.5 (15.2; 21.5)           | 17.6 (13.4; 20.8)           | 17.9 (15.0; 21.0)           | 18.2 (15.0; 22.1)           |
| CD95R absolute                           | Pl | 0.3 (0.2; 0.4)              | 0.3 (0.2; 0.4)              | 0.3 (0.2; 0.4)              | 0.3 (0.2; 0.4)              | 0.3 (0.2; 0.4)              | 0.4 (0.2; 0.4)              |
| [x10 <sup>6</sup> /ml]                   | Tr | 0.3 (0.2; 0.4)              | 0.3 (0.3; 0.4)              | 0.4 (0.3; 0.5)              | 0.3 (0.2; 0.4)              | 0.3 (0.2; 0.4)              | 0.3 (0.2; 0.4)              |
| CD95L                                    | Pl | 6.3 (3.8; 11.4)             | 3.8 (2.6; 6.1)              | 4.9 (1.7; 9.2)              | 6.5 (2.3; 11.3)             | 4.7 (2.1; 8.3)              | 5.1 (2.6; 12.9)             |
| [%]                                      | Tr | [n=38]<br>5.2 (2.9; 12.7)   | [n=39]<br>3.9 (2.7; 6.1)    | [n=39]<br>4.9 (2.2; 8.6)    | [n=39]<br>4.2 (2.9; 11.3)   | [n=39]<br>6.6 (2.7; 18.5)   | [n=39]<br>3.5 (1.8; 10.4)   |
| [batch 1]                                | Pl | [n=39]<br>67.2 (53.1; 77.8) | [n=40]<br>80.0 (70.0; 86.8) | [n=40]<br>72.2 (61.3; 90.5) | [n=39]<br>76.3 (62.0; 81.7) | [n=40]<br>66.6 (48.3; 86.7) | [n=39]<br>79.4 (56.3; 89.5) |
| CD95L                                    | Tr | [n=8]<br>68.3 (52.0; 74.1)  | [n=8]<br>72.5 (68.0; 76.9)  | [n=8]<br>66.8 (48.6; 71.3)  | [n=8]<br>71.4 (56.1; 89.2)  | [n=8]<br>78.2 (50.2; 93.5)  | [n=8]<br>80.0 (56.0; 91.0)  |
| [%]                                      | Pl | [n=7]<br>1.3 (0.7; 2.0)     | [n=7]<br>0.9 (0.6; 1.7)     | [n=7]<br>0.9 (0.4; 1.7)     | [n=7]<br>1.0 (0.4; 1.6)     | [n=7]<br>0.7 (0.4; 1.4)     | [n=7]<br>0.8 (0.4; 1.7)     |
| [batch 2]                                | Tr | [n=37]<br>0.9 (0.5; 2.1)    | [n=38]<br>0.8 (0.6; 1.4)    | [n=39]<br>0.8 (0.4; 1.6)    | [n=39]<br>0.8 (0.4; 2.6)    | [n=39]<br>1.1 (0.5; 3.0)    | [n=39]<br>0.7 (0.3; 1.5)    |
| CD95L absolute                           | Pl | [n=39]<br>1.5 (1.1; 1.6)    | [n=39]<br>1.7 (1.5; 1.9)    | [n=40]<br>1.4 (1.2; 1.8)    | [n=39]<br>1.4 (1.3; 1.8)    | [n=40]<br>1.2 (0.9; 1.8)    | [n=39]<br>1.5 (1.0; 1.7)    |
| [x10 <sup>6</sup> /ml] x10 <sup>-1</sup> | Tr | [n=8]<br>1.2 (0.9; 1.5)     | [n=8]<br>1.3 (1.2; 1.7)     | [n=8]<br>1.2 (1.0; 1.4)     | [n=8]<br>1.0 (0.9; 1.6)     | [n=8]<br>1.2 (0.8; 1.76)    | [n=8]<br>1.2 (0.8; 1.7)     |
| [batch 1]                                | Pl | [n=7]<br>1.5 (1.1; 1.6)     | [n=7]<br>1.7 (1.5; 1.9)     | [n=7]<br>1.4 (1.2; 1.8)     | [n=7]<br>1.4 (1.3; 1.8)     | [n=7]<br>1.2 (0.9; 1.8)     | [n=7]<br>1.5 (1.0; 1.7)     |
| CD95L absolute                           | Tr | [n=8]<br>1.2 (0.9; 1.5)     | [n=8]<br>1.3 (1.2; 1.7)     | [n=8]<br>1.2 (1.0; 1.4)     | [n=8]<br>1.0 (0.9; 1.6)     | [n=8]<br>1.2 (0.8; 1.76)    | [n=8]<br>1.2 (0.8; 1.7)     |
| [x10 <sup>6</sup> /ml]                   | Pl | [n=7]<br>1.2 (0.9; 1.5)     | [n=7]<br>1.3 (1.2; 1.7)     | [n=7]<br>1.2 (1.0; 1.4)     | [n=7]<br>1.0 (0.9; 1.6)     | [n=7]<br>1.2 (0.8; 1.76)    | [n=7]<br>1.2 (0.8; 1.7)     |
| [batch 2]                                | Tr | [n=7]<br>1.2 (0.9; 1.5)     | [n=7]<br>1.3 (1.2; 1.7)     | [n=7]<br>1.2 (1.0; 1.4)     | [n=7]<br>1.0 (0.9; 1.6)     | [n=7]<br>1.2 (0.8; 1.76)    | [n=7]<br>1.2 (0.8; 1.7)     |

Soluble inflammatory mediators

|                          |    |                   |                   |                   |                  |                  |                  |
|--------------------------|----|-------------------|-------------------|-------------------|------------------|------------------|------------------|
| CXCL8                    | Pl | 4.5 (3.2; 6.3)    | 8.7 (6.1; 10.3)   | 7.8 (5.2; 12.5)   | 5.4 (3.1; 7.2)   | 5.0 (3.9; 6.7)   | 5.1 (3.1; 7.2)   |
| [pg/ml] x10 <sup>4</sup> | Tr | 5.0 (3.5; 7.1)    | 8.7 (5.8; 10.6)   | 8.4 (5.9; 12.5)   | 4.9 (3.3; 6.6)   | 4.7 (3.4; 7.3)   | 5.4 (3.2; 6.9)   |
| CXCL8 serum              | Pl | 5.5 (4.0; 7.9)    | 6.3 (4.5; 8.3)    | 6.1 (4.2; 8.2)    | 5.7 (4.6; 7.5)   | 5.6 (4.6; 7.4)   | 6.1 (4.2; 8.4)   |
| [pg/ml]                  | Tr | 4.9 (3.8; 6.8)    | 6.5 (4.6; 8.2)    | 5.6 (4.1; 7.2)    | 5.6 (4.3; 7.0)   | 5.3 (3.9; 6.9)   | 5.5 (3.9; 6.5)   |
| CCL2                     | Pl | 12.7 (6.7; 18.0)  | 24.1 (17.4; 29.6) | 23.4 (13.8; 29.2) | 12.9 (7.1; 19.3) | 11.4 (9.3; 18.3) | 10.1 (6.3; 15.8) |
| [pg/ml] x10 <sup>3</sup> | Tr | 15.9 (10.5; 21.2) | 28.5 (16.8; 40.8) | 24.4 (14.7; 35.3) | 14.4 (7.7; 21.7) | 12.3 (8.7; 21.9) | 13.0 (8.3; 19.7) |

|                          |    |                   |                   |                   |                   |                   |                   |
|--------------------------|----|-------------------|-------------------|-------------------|-------------------|-------------------|-------------------|
| CCL2 serum               | Pl | 3.4 (2.7; 4.4)    | 4.3 (3.7; 5.2)    | 5.7 (4.5; 7.9)    | 3.4 (2.8; 4.3)    | 3.0 (2.6; 3.8)    | 3.1 (2.6; 3.8)    |
| [pg/ml] x10 <sup>2</sup> | Tr | 3.5 (2.9; 5.3)    | 4.5 (3.8; 6.1)    | 5.8 (4.6; 7.6)    | 3.9 (3.1; 4.5)    | 3.3 (2.9; 4.0)    | 3.3 (2.5; 4.0)    |
| CCL3                     | Pl | 7.7 (5.7; 10.2)   | 11.5 (8.9; 14.7)  | 13.2 (8.6; 19.0)  | 8.1 (5.3; 10.4)   | 7.6 (5.8; 11.4)   | 7.9 (6.2; 10.3)   |
| [pg/ml] x10 <sup>4</sup> | Tr | 8.5 (6.2; 10.7)   | 11.8 (8.8; 14.9)  | 13.5 (10.6; 16.5) | 8.8 (5.8; 11.4)   | 8.5 (6.0; 10.5)   | 8.5 (6.1; 10.8)   |
| CCL4                     | Pl | 8.0 (6.6; 11.1)   | 11.1 (8.9; 13.7)  | 12.5 (9.7; 17.9)  | 8.9 (6.0; 11.4)   | 9.1 (6.6; 11.3)   | 9.2 (6.7; 11.7)   |
| [pg/ml] x10 <sup>5</sup> | Tr | 9.3 (6.8; 11.8)   | 12.5 (8.9; 15.4)  | 14.1 (11.9; 16.3) | 9.5 (6.6; 11.7)   | 9.0 (7.6; 10.9)   | 9.6 (6.9; 10.4)   |
| CCL11                    | Pl | 2.6 (1.9; 3.0)    | 2.5 (1.8; 2.8)    | 2.3 (1.7; 2.7)    | 2.4 (1.8; 2.9)    | 2.4 (1.8; 3.0)    | 2.6 (1.8; 2.9)    |
| [pg/ml] x10 <sup>2</sup> | Tr | 2.4 (1.8; 3.0)    | 2.2 (1.6; 2.9)    | 2.3 (1.7; 2.6)    | 2.3 (1.6; 3.1)    | 2.1 (1.7; 2.7)    | 2.2 (1.7; 3.0)    |
| Factor VII               | Pl | 2.2 (1.9; 2.4)    | 2.1 (1.9; 2.4)    | 2.2 (1.9; 2.4)    | 2.1 (1.9; 2.3)    | 2.2 (2.2; 2.4)    | 2.3 (2.0; 2.5)    |
| [ng/ml] x10 <sup>2</sup> | Tr | 2.2 (1.8; 2.5)    | 2.1 (1.7; 2.4)    | 2.1 (1.8; 2.4)    | 2.2 (1.8; 2.4)    | 2.1 (1.8; 2.5)    | 2.2 (1.8; 2.6)    |
| ICAM-1                   | Pl | 46.0 (39.0; 53.0) | 50.0 (43.0; 59.0) | 47.0 (42.0; 54.0) | 46.0 (42.0; 57.0) | 46.0 (41.0; 57.0) | 50.5 (43.0; 59.0) |
| [pg/ml]                  | Tr | 51.5 (43.0; 59.0) | 51.0 (44.0; 62.0) | 50.0 (45.0; 58.0) | 50.0 (44.0; 58.0) | 49.0 (43.0; 58.0) | 50.5 (43.0; 59.0) |
| IFN- $\gamma$            | Pl | 3.6 (0.8; 6.7)    | 5.8 (1.9; 12.5)   | 3.5 (1.4; 7.6)    | 3.7 (1.2; 7.6)    | 4.4 (1.8; 6.4)    | 3.8 (1.5; 8.5)    |
| [pg/ml] x10 <sup>3</sup> | Tr | 3.6 (2.0; 7.7)    | 5.9 (2.3; 13.6)   | 5.6 (2.3; 9.5)    | 5.6 (2.4; 9.2)    | 5.0 (1.8; 10.6)   | 4.4 (2.4; 8.4)    |
| IL-1 $\alpha$            | Pl | 0.2 (0.2; 0.3)    | 0.4 (0.3; 0.5)    | 0.4 (0.3; 0.5)    | 0.3 (0.2; 0.4)    | 0.3 (0.2; 0.4)    | 0.3 (0.2; 0.3)    |
| [ng/ml]                  | Tr | 0.3 (0.1; 0.3)    | 0.4 (0.2; 0.5)    | 0.4 (0.3; 0.5)    | 0.3 (0.2; 0.4)    | 0.3 (0.2; 0.4)    | 0.3 (0.1; 0.4)    |
| IL-1 $\beta$             | Pl | 10.0 (7.4; 13.9)  | 13.6 (9.3; 18.7)  | 16.7 (13.1; 23.3) | 12.9 (9.1; 17.0)  | 12.2 (8.7; 16.5)  | 11.9 (8.5; 15.6)  |
| [pg/ml] x10 <sup>3</sup> | Tr | 12.1 (7.9; 17.3)  | 14.4 (8.6; 20.2)  | 16.7 (14.1; 23.2) | 14.3 (8.7; 18.9)  | 12.7 (7.5; 18.1)  | 12.5 (7.8; 16.3)  |
| IL-1 $\beta$ serum       | Pl | 4.5 (3.9; 5.1)    | 5.2 (4.4; 6.3)    | 4.7 (3.8; 5.3)    | 4.3 (3.6; 5.2)    | 4.4 (3.8; 5.2)    | 4.5 (3.5; 5.1)    |
| [pg/ml]                  | Tr | 4.3 (3.7; 5.4)    | 5.3 (4.4; 6.4)    | 4.7 (3.9; 5.5)    | 4.2 (3.7; 5.2)    | 4.5 (3.5; 5.2)    | 4.8 (4.0; 5.4)    |
| IL-1ra                   | Pl | 5.7 (4.7; 6.9)    | 7.5 (6.2; 9.0)    | 10.7 (8.3; 12.8)  | 6.3 (5.1; 7.5)    | 6.3 (5.2; 7.3)    | 6.2 (5.0; 7.3)    |
| [pg/ml] x10 <sup>3</sup> | Tr | 6.4 (4.9; 8.2)    | 8.1 (6.6; 10.4)   | 11.1 (8.4; 14.1)  | 6.6 (5.4; 8.0)    | 6.6 (5.6; 8.5)    | 6.3 (5.2; 7.5)    |
| IL-1ra serum             | Pl | 0.8 (0.6; 1.0)    | 1.0 (0.8; 1.1)    | 0.8 (0.7; 1.0)    | 0.7 (0.6; 1.0)    | 0.8 (0.6; 1.0)    | 0.8 (0.6; 1.0)    |
| [pg/ml] x10 <sup>3</sup> | Tr | 0.9 (0.7; 1.1)    | 1.1 (0.9; 1.3)    | 0.8 (0.7; 1.1)    | 0.8 (0.6; 1.0)    | 0.9 (0.7; 1.1)    | 0.9 (0.7; 1.1)    |
| IL-2                     | Pl | 0.9 (0.2; 1.9)    | 0.7 (0.1; 2.3)    | 0.6 (0.2; 2.1)    | 0.7 (0.2; 2.2)    | 0.8 (0.3; 1.9)    | 1.1 (0.2; 2.4)    |
| [pg/ml] x10 <sup>3</sup> | Tr | 1.5 (0.4; 2.6)    | 1.2 (0.3; 2.3)    | 1.6 (0.6; 3.5)    | 1.6 (0.6; 2.4)    | 1.5 (0.7; 2.6)    | 1.4 (0.6; 2.5)    |
| IL-4                     | Pl | 2.4 (1.1; 3.4)    | 2.0 (1.1; 3.2)    | 2.2 (1.1; 3.8)    | 2.0 (1.1; 2.8)    | 2.0 (1.2; 3.2)    | 2.2 (1.1; 3.4)    |
| [pg/ml] x10 <sup>2</sup> | Tr | 2.3 (1.4; 3.7)    | 2.2 (1.3; 3.4)    | 3.0 (1.7; 4.2)    | 2.5 (1.5; 3.7)    | 2.5 (1.3; 3.4)    | 2.6 (1.6; 3.6)    |
| IL-5                     | Pl | 9.8 (4.4; 18.0)   | 6.1 (3.4; 19.0)   | 12.0 (3.5; 24.0)  | 9.6 (3.9; 16.0)   | 8.9 (4.4; 17.0)   | 10.0 (4.1; 19.5)  |
| [pg/ml]                  | Tr | 13.0 (4.7; 21.0)  | 11.0 (4.8; 22.0)  | 14.5 (6.7; 25.0)  | 12.0 (5.9; 23.0)  | 12.5 (5.6; 22.0)  | 14.0 (4.7; 22.0)  |
| IL-6                     | Pl | 5.3 (4.1; 8.0)    | 8.1 (6.2; 11.0)   | 9.3 (6.5; 13.5)   | 6.3 (4.5; 7.6)    | 6.4 (4.9; 8.5)    | 6.0 (5.1; 8.3)    |
| [pg/ml] x10 <sup>4</sup> | Tr | 6.6 (4.9; 8.6)    | 9.0 (6.2; 12.3)   | 10.0 (8.2; 14.2)  | 7.2 (4.7; 9.1)    | 6.4 (4.9; 9.0)    | 6.1 (5.0; 8.4)    |
| IL-6 serum               | Pl | 4.5 (4.5; 4.5)    | 4.5 (4.5; 4.5)    | 4.5 (4.5; 4.5)    | 4.5 (4.5; 4.5)    | 4.5 (4.5; 4.5)    | 4.5 (4.5; 4.5)    |
| [pg/ml]                  | Tr | 4.5 (4.5; 4.5)    | 4.5 (4.5; 4.5)    | 4.5 (4.5; 4.5)    | 4.5 (4.5; 4.5)    | 4.5 (4.5; 4.5)    | 4.5 (4.5; 4.5)    |
| IL-7                     | Pl | 1.7 (1.4; 1.8)    | 1.9 (1.8; 2.1)    | 1.9 (1.7; 2.1)    | 1.6 (1.5; 2.0)    | 1.7 (1.5; 1.9)    | 1.6 (1.5; 1.8)    |
| [pg/ml] x10 <sup>2</sup> | Tr | 1.7 (1.4; 1.9)    | 1.9 (1.8; 2.1)    | 1.9 (1.6; 2.1)    | 1.6 (1.4; 1.9)    | 1.7 (1.4; 1.9)    | 1.6 (1.4; 2.0)    |
| IL-10                    | Pl | 0.9 (0.4; 1.4)    | 1.4 (0.8; 1.8)    | 1.2 (0.6; 1.7)    | 0.9 (0.4; 1.3)    | 1.0 (0.5; 1.3)    | 0.9 (0.4; 1.3)    |
| [pg/ml] x10 <sup>4</sup> | Tr | 1.1 (0.7; 1.5)    | 1.3 (1.0; 1.9)    | 1.4 (0.9; 1.8)    | 0.9 (0.6; 1.4)    | 1.0 (0.7; 1.5)    | 1.0 (0.7; 1.5)    |
| IL-12p40                 | Pl | 12.0 (8.8; 17.0)  | 13.0 (8.3; 17.0)  | 17.0 (13.0; 22.0) | 12.0 (8.2; 19.0)  | 13.0 (10.0; 17.0) | 13.0 (11.0; 17.5) |
| [ng/ml]                  | Tr | 14.0 (9.4; 17.0)  | 14.0 (10.0; 16.0) | 20.0 (13.0; 24.0) | 14.0 (11.0; 18.0) | 14.0 (9.6; 19.0)  | 15.0 (11.0; 17.0) |
| IL-12p70                 | Pl | 1.0 (0.4; 2.4)    | 0.7 (0.4; 1.5)    | 0.7 (0.4; 2.0)    | 0.8 (0.4; 2.5)    | 0.9 (0.4; 1.6)    | 0.9 (0.4; 2.3)    |
| [pg/ml] x10 <sup>2</sup> | Tr | 0.9 (0.4; 1.4)    | 0.6 (0.4; 1.1)    | 0.8 (0.5; 1.2)    | 1.1 (0.5; 1.5)    | 0.6 (0.4; 1.6)    | 0.8 (0.4; 1.6)    |

|                                  |    |      |              |      |              |      |              |      |              |      |              |      |              |
|----------------------------------|----|------|--------------|------|--------------|------|--------------|------|--------------|------|--------------|------|--------------|
| IL-15                            | Pl | 1.4  | (1.2; 1.6)   | 1.6  | (1.4; 1.8)   | 1.7  | (1.4; 1.9)   | 1.5  | (1.3; 1.8)   | 1.4  | (1.2; 1.8)   | 1.5  | (1.3; 1.7)   |
| [ng/ml]                          | Tr | 1.5  | (1.3; 1.6)   | 1.7  | (1.3; 1.9)   | 1.7  | (1.5; 2.0)   | 1.6  | (1.3; 1.8)   | 1.5  | (1.2; 1.7)   | 1.5  | (1.2; 1.8)   |
| IL-17                            | Pl | 0.7  | (0.3; 1.4)   | 0.9  | (0.3; 1.6)   | 1.0  | (0.3; 1.7)   | 0.7  | (0.3; 1.5)   | 0.9  | (0.3; 1.4)   | 0.9  | (0.3; 1.6)   |
| [pg/ml] x10 <sup>2</sup>         | Tr | 1.1  | (0.6; 1.8)   | 1.0  | (0.5; 1.7)   | 1.3  | (0.7; 2.2)   | 1.1  | (0.5; 1.6)   | 1.1  | (0.6; 1.7)   | 1.0  | (0.6; 1.7)   |
| IL-18                            | Pl | 3.4  | (2.6; 3.8)   | 3.8  | (3.4; 4.6)   | 3.9  | (3.5; 4.8)   | 3.5  | (3.0; 4.2)   | 3.3  | (2.9; 4.1)   | 3.5  | (3.1; 3.9)   |
| [pg/ml] x10 <sup>2</sup>         | Tr | 3.3  | (2.8; 4.0)   | 3.7  | (3.0; 4.6)   | 3.9  | (3.4; 4.9)   | 3.6  | (3.1; 4.3)   | 3.4  | (2.9; 4.0)   | 3.3  | (2.8; 3.9)   |
| IL-23                            | Pl | 17.0 | (13.0; 28.0) | 20.0 | (14.0; 25.0) | 27.0 | (19.0; 35.0) | 17.0 | (12.0; 27.0) | 21.0 | (13.0; 26.0) | 20.0 | (15.0; 27.0) |
| [ng/ml]                          | Tr | 20.5 | (13.0; 27.0) | 22.0 | (16.0; 27.0) | 28.5 | (22.0; 32.0) | 21.0 | (14.0; 27.0) | 21.0 | (14.0; 27.0) | 19.5 | (16.0; 27.0) |
| TNF- $\alpha$                    | Pl | 2.1  | (1.5; 3.2)   | 2.5  | (1.6; 3.8)   | 2.9  | (2.0; 4.5)   | 2.2  | (1.4; 3.2)   | 2.4  | (1.5; 3.1)   | 2.3  | (1.7; 3.3)   |
| [pg/ml] x10 <sup>4</sup>         | Tr | 2.2  | (1.5; 2.8)   | 2.7  | (1.9; 3.6)   | 3.6  | (2.4; 4.4)   | 2.9  | (1.7; 3.3)   | 2.4  | (1.7; 3.3)   | 2.3  | (1.9; 2.8)   |
| TNF- $\alpha$ serum              | Pl | 14.0 | (14.0; 14.0) | 14.0 | (14.0; 15.5) | 14.0 | (14.0; 14.0) | 14.0 | (14.0; 14.0) | 14.0 | (14.0; 14.5) | 14.0 | (14.0; 14.0) |
| [pg/ml]                          | Tr | 14.0 | (14.0; 14.0) | 14.0 | (14.0; 15.0) | 14.0 | (14.0; 14.0) | 14.0 | (14.0; 14.5) | 14.0 | (14.0; 14.0) | 14.0 | (14.0; 14.0) |
| TNF- $\beta$                     | Pl | 62.0 | (47.0; 71.0) | 66.0 | (62.0; 79.0) | 66.0 | (54.0; 79.0) | 60.0 | (46.0; 72.0) | 62.0 | (56.0; 76.0) | 67.5 | (60.5; 78.0) |
| [pg/ml]                          | Tr | 65.5 | (54.0; 76.0) | 68.0 | (59.0; 86.0) | 76.0 | (58.0; 87.0) | 66.0 | (55.0; 80.0) | 68.0 | (54.0; 84.0) | 71.0 | (47.0; 79.0) |
| <u>Growth factors</u>            |    |      |              |      |              |      |              |      |              |      |              |      |              |
| BDNF                             | Pl | 12.0 | (9.9; 14.0)  | 16.0 | (13.0; 19.0) | 13.0 | (10.0; 16.0) | 13.0 | (9.9; 15.0)  | 13.0 | (10.0; 15.0) | 13.0 | (9.9; 16.5)  |
| [ng/ml]                          | Tr | 14.0 | (11.0; 16.0) | 17.0 | (14.0; 22.0) | 14.0 | (11.0; 17.0) | 14.0 | (10.0; 18.0) | 14.0 | (10.0; 16.0) | 12.0 | (11.0; 16.0) |
| GM-CSF                           | Pl | 1.7  | (0.5; 3.4)   | 2.0  | (0.7; 5.1)   | 1.7  | (0.6; 3.6)   | 1.5  | (0.6; 3.3)   | 1.7  | (0.7; 2.7)   | 1.9  | (0.6; 3.3)   |
| [pg/ml] x10 <sup>2</sup>         | Tr | 2.0  | (0.8; 3.4)   | 2.3  | (0.9; 4.0)   | 1.8  | (1.0; 3.5)   | 2.4  | (0.9; 3.9)   | 1.9  | (0.8; 3.9)   | 1.9  | (0.9; 3.1)   |
| IL-3                             | Pl | 2.5  | (2.0; 3.4)   | 3.2  | (2.2; 4.4)   | 2.8  | (2.1; 3.7)   | 2.4  | (2.0; 3.5)   | 2.6  | (2.1; 3.6)   | 3.0  | (2.1; 3.7)   |
| [ng/ml] x10 <sup>2</sup>         | Tr | 2.7  | (2.1; 3.7)   | 3.3  | (2.5; 4.2)   | 3.2  | (2.2; 4.2)   | 2.8  | (2.0; 3.5)   | 3.1  | (2.2; 4.1)   | 2.9  | (2.2; 3.4)   |
| SCF                              | Pl | 0.8  | (0.6; 0.9)   | 1.0  | (0.7; 1.1)   | 1.0  | (0.9; 1.1)   | 0.8  | (0.7; 1.1)   | 0.8  | (0.7; 1.0)   | 0.8  | (0.7; 1.0)   |
| [pg/ml] x10 <sup>4</sup>         | Tr | 0.8  | (0.6; 1.0)   | 1.0  | (0.7; 1.2)   | 1.0  | (0.9; 1.1)   | 0.9  | (0.7; 1.0)   | 0.8  | (0.6; 1.0)   | 0.8  | (0.7; 1.0)   |
| VEGF                             | Pl | 2.3  | (1.9; 2.8)   | 2.8  | (2.3; 3.0)   | 3.0  | (2.6; 3.4)   | 2.5  | (2.1; 3.2)   | 2.5  | (2.2; 3.1)   | 2.4  | (2.2; 3.0)   |
| [pg/ml] x10 <sup>2</sup>         | Tr | 2.6  | (2.0; 3.0)   | 2.7  | (2.3; 3.2)   | 3.0  | (2.7; 3.4)   | 2.8  | (2.2; 3.1)   | 2.8  | (1.9; 3.1)   | 2.6  | (1.9; 2.8)   |
| <u>Matrix metalloproteinases</u> |    |      |              |      |              |      |              |      |              |      |              |      |              |
| MMP-3                            | Pl | 6.6  | (5.6; 9.1)   | 15.0 | (12.0; 21.0) | 9.0  | (7.2; 12.0)  | 7.4  | (6.6; 10.0)  | 8.1  | (6.4; 11.0)  | 7.5  | (6.3; 11.0)  |
| [ng/ml]                          | Tr | 8.5  | (5.7; 10.0)  | 18.0 | (13.0; 23.0) | 9.3  | (7.7; 14.0)  | 8.3  | (6.9; 10.0)  | 8.6  | (7.0; 10.0)  | 8.3  | (6.6; 12.0)  |
| MMP-9                            | Pl | 1.4  | (1.2; 1.6)   | 1.6  | (1.4; 1.8)   | 1.9  | (1.7; 2.2)   | 1.5  | (1.3; 1.7)   | 1.4  | (1.3; 1.6)   | 1.4  | (1.2; 1.6)   |
| [ng/ml] x10 <sup>2</sup>         | Tr | 1.4  | (1.2; 1.6)   | 1.6  | (1.4; 1.8)   | 1.9  | (1.6; 2.1)   | 1.5  | (1.2; 1.7)   | 1.4  | (1.2; 1.6)   | 1.5  | (1.2; 1.6)   |
| <u>Acute phase protein</u>       |    |      |              |      |              |      |              |      |              |      |              |      |              |
| CRP                              | Pl | 0.4  | (0.2; 0.8)   | 0.4  | (0.2; 0.8)   | 0.4  | (0.2; 0.8)   | 1.5  | (0.8; 3.3)   | 1.0  | (0.6; 2.2)   | 0.8  | (0.4; 1.8)   |
| [mg/L]                           | Tr | 0.4  | (0.3; 0.7)   | 0.4  | (0.3; 0.7)   | 0.4  | (0.3; 0.7)   | 1.6  | (1.1; 2.5)   | 1.1  | (0.7; 2.0)   | 0.8  | (0.4; 1.2)   |

BDNF = Brain-Derived Neurotrophic Factor; CK = creatine kinase; CRP = C-reactive Protein; GM-CSF = Granulocyte Macrophage Colony-Stimulating Factor; ICAM-1 = Inter-Cellular Adhesion Molecule 1; IFN- $\gamma$  = Interferon-gamma; LDH = lactate dehydrogenase; MMP = Matrix Metalloproteinase; SCF = Stem Cell Factor; TNF = Tumor Necrosis Factor; VEGF = Vascular Endothelial Growth Factor  
 Values: Median (1. Quartile; 3. Quartile)

Supplemental table S2:

| group          | Low responders<br>[<500 U/L] | Medium responders<br>[500-2000 U/L] | High responders<br>[>2000 U/L] | Total | p Value |
|----------------|------------------------------|-------------------------------------|--------------------------------|-------|---------|
| <b>Placebo</b> | n= 13<br>27.66 %             | n= 32<br>68.09 %                    | n= 2<br>4.26 %                 | n= 47 | 0.83    |
| <b>Tr14</b>    | n= 15<br>31.25 %             | n= 30<br>62.50 %                    | n= 3<br>6.25 %                 | n= 48 |         |
| <b>Total</b>   | n= 28                        | n= 62                               | n= 5                           | n= 95 |         |
